# Supplementary material
Source: PubMed Central journal article supplement (PMC2904418)

**A**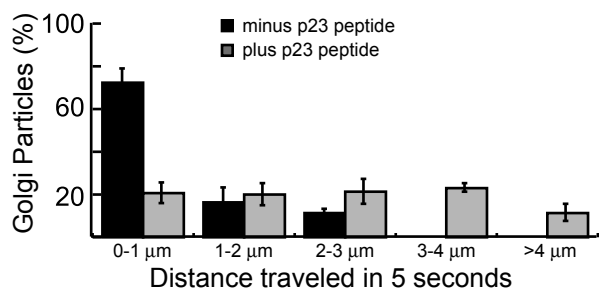**B**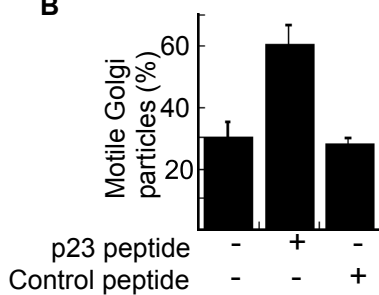**C**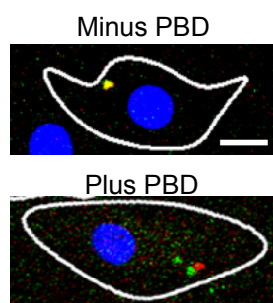**D**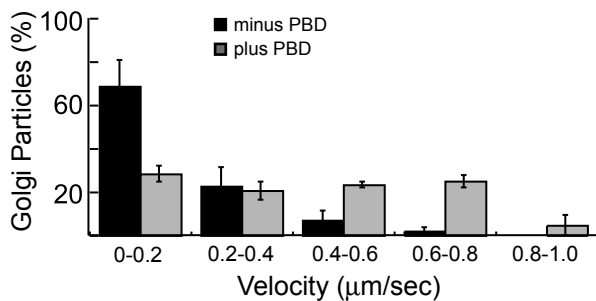**E**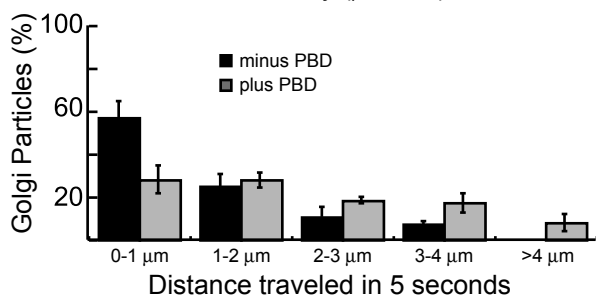

Supplement: NIHMS208976-supplement-Supp_Fig_s4.pdf [file NIHMS208976-supplement-Supp_Fig_s4.pdf]
